# Supplementary material for: Inorganic perovskite engineering through incorporation of a carboxylic acid containing ligand for performance enhancement in perovskite light-emitting diodes
Source: Royal Society of Chemistry journal article supplement (doi:10.1039/c9tc04834k), 2019-01-01
Supplement: c9tc04834k1.pdf [file c9tc04834k1.pdf]

## Supporting Information

### **Inorganic Perovskite Engineering Through Incorporation of Carboxylic Acid Containing Ligand for Performance Enhancement in Perovskite Light-Emitting Diodes**

Jiayue Chen, Xiaojie Chen, Dongyu Ma, Guangfu Li, Juan Zhao, Dongxia Zhu, Zhenguo Chi

#### **Emails of corresponding authors:**

zhudx047@nenu.edu.cn; chizhg@mail.sysu.edu.cn; zhaoj95@mail.sysu.edu.cn

## **1 Experimental**

**1.1 Materials:** Cesium bromide (CsBr), lead (II) bromide (PbBr<sub>2</sub>), poly(3,4-ethylenedioxythiophene):poly(styrenesulfonate) (PEDOT:PSS, 4083), 1,3,5-tris(N-phenylbenzimidazol-2-yl)benzene (TPBI) and phenmethylammonium bromide (PMABr) were used as purchased from Xi'an Polymer Light Technology Corp., 4-(Aminomethyl)benzoic acid (97%) was purchased from Aladdin. Hydrobromic acid (HBr) was purchased from Fuchen (Tianjin) Chemical Reagents Co. Ltd., dimethyl sulfoxide (DMSO) was purchased from J&K Scientific Ltd., tetrahydrofuran (THF), ethanol and toluene were purchased from Guangzhou Chemical Reagent Factory. All materials were used without further purification.

**1.2 Device Fabrication and Characterization.** Indium tin oxide (ITO)-coated glass substrates were ultrasonically cleaned prior to O<sub>2</sub> plasma treatment. Subsequently, PEDOT:PSS was spin-coated on the treated ITO at a speed of 3000 rpm for 60 s, following by thermal annealing for 30 min at 150 °C under atmospheric environment, then the substrates were treated with O<sub>2</sub> plasma again for 15 s to make the surface more hydrophilic. After that, the substrates were transferred into a glovebox and the

perovskite precursor solutions were spin-coated onto the PEDOT:PSS films at 5500 rpm for 50 s and annealed at 65 °C for 20 min. Then, the perovskite-coated substrates were transferred to a thermal evaporation chamber, wherein organic and metal cathode layers were sequentially deposited under vacuum pressure of  $3 \times 10^{-4}$  Pa, leading to an active area of 9 mm<sup>2</sup>. The current density–voltage–luminance characteristics and electroluminescence (EL) spectra of PeLEDs were measured using a Keithley 2400 source combined with a Photo Research PR735 spectrometer under room temperature, while external quantum efficiency (EQE) was calculated based on a computer program.

## 2. Supplementary tables and figures

**Table S1** TRPL characteristics of perovskite films.

| Perovskite                                           | $\lambda$<br>(nm) | $B_1$<br>(%) | $\tau_1$<br>(ns) | $B_2$<br>(%) | $\tau_2$<br>(ns) | $B_3$<br>(%) | $\tau_3$<br>(ns) | $\tau_{\text{avg}}$<br>(ns) |
|------------------------------------------------------|-------------------|--------------|------------------|--------------|------------------|--------------|------------------|-----------------------------|
| CsPbBr <sub>3</sub>                                  | 520               | 4.74         | 6.50             | 6.12         | 201.64           | 89.14        | 0.33             | 12.94                       |
| x=1.0                                                | 517               | 38.57        | 0.82             | 40.52        | 8.99             | 20.91        | 49.08            | 14.22                       |
| x=1.5                                                | 516               | 37.18        | 6.97             | 12.27        | 153.28           | 50.55        | 1.54             | 22.17                       |
| x=2.0                                                | 514               | 27.30        | 17.36            | 34.55        | 147.23           | 38.15        | 0.66             | 55.86                       |
| x=2.5                                                | 507               | 31.03        | 11.53            | 15.10        | 186.41           | 53.87        | 1.88             | 32.74                       |
| (PMA) <sub>2</sub> CsPb <sub>2</sub> Br <sub>7</sub> | 466               | 14.14        | 7.67             | 10.97        | 94.53            | 74.89        | 0.81             | 12.06                       |
|                                                      | 517               | 20.26        | 8.97             | 27.99        | 120.39           | 51.75        | 0.92             | 35.99                       |

The TRPL profiles were fitted by a three-exponential decay model as  $I(\tau) = B_1 \cdot \exp(-t/\tau_1) + B_2 \cdot \exp(-t/\tau_2) + B_3 \cdot \exp(-t/\tau_3)$ , wherein  $\tau_1$ ,  $\tau_2$ ,  $\tau_3$  are the lifetimes of the first, second and third components, respectively;  $B_1$ ,  $B_2$ ,  $B_3$  are the proportions of the first, second and third lifetime components, respectively, and  $B_1 + B_2 + B_3 = 1$ . The average lifetime ( $\tau_{\text{avg}}$ ) was calculated by  $\tau_{\text{avg}} = (B_1 \cdot \tau_1 + B_2 \cdot \tau_2 + B_3 \cdot \tau_3) / (B_1 + B_2 + B_3)$ .

**Table S2** Electrical performance of the PeLEDs based on CsPbBr<sub>3</sub>, (HOOC-PMA)<sub>x</sub>CsPb<sub>2</sub>Br<sub>(5+x)</sub> (x=1.0, 1.5, 2.0, 2.5), and (PMA)<sub>2</sub>CsPb<sub>2</sub>Br<sub>7</sub> perovskites.

| Device                                               | $\lambda_{\text{EL}}^{\text{a}}$<br>(nm) | $L_{\text{max}}^{\text{b}}$<br>(cd m <sup>-2</sup> ) | $\text{CE}_{\text{max}}^{\text{c}}$<br>(cd A <sup>-1</sup> ) | $\text{EQE}_{\text{max}}^{\text{d}}$<br>(%) | $\text{FWHM}^{\text{e}}$<br>(nm) | $\text{CIE}^{\text{f}}$<br>(x, y) |
|------------------------------------------------------|------------------------------------------|------------------------------------------------------|--------------------------------------------------------------|---------------------------------------------|----------------------------------|-----------------------------------|
| CsPbBr <sub>3</sub>                                  | 520                                      | 205                                                  | 0.08                                                         | 0.02                                        | 22                               | 0.136,0.730                       |
| x=1.0                                                | 515                                      | 949                                                  | 0.61                                                         | 0.12                                        | 25                               | 0.090, 0.716                      |
| x=1.5                                                | 514                                      | 1641                                                 | 0.93                                                         | 0.29                                        | 25                               | 0.101, 0.725                      |
| x=2.0                                                | 514                                      | 8692                                                 | 5.27                                                         | 1.61                                        | 25                               | 0.096, 0.723                      |
| x=2.5                                                | 508                                      | 2985                                                 | 1.29                                                         | 0.40                                        | 26                               | 0.074, 0.620                      |
| (PMA) <sub>2</sub> CsPb <sub>2</sub> Br <sub>7</sub> | 515                                      | 1765                                                 | 0.93                                                         | 0.33                                        | 23                               | 0.107,0.732                       |

<sup>a</sup>EL peak wavelength, <sup>b</sup>maximum luminance, <sup>c</sup>maximum current efficiency, <sup>d</sup>maximum external quantum efficiency, <sup>e</sup>full width at half maximum, <sup>f</sup>1931 CIE coordinates at a voltage of 6 V.

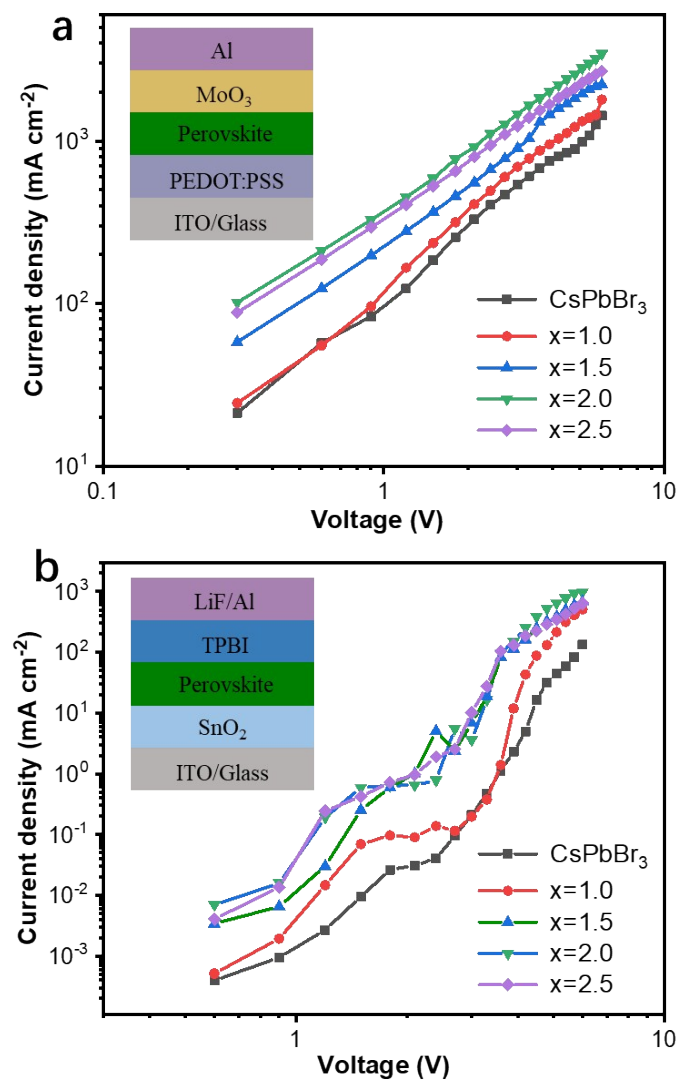

**Figure S1.** Current density–voltage curves for (a) hole-only and (b) electron-only devices. Inset: device configurations of the hole-only and electron-only devices.

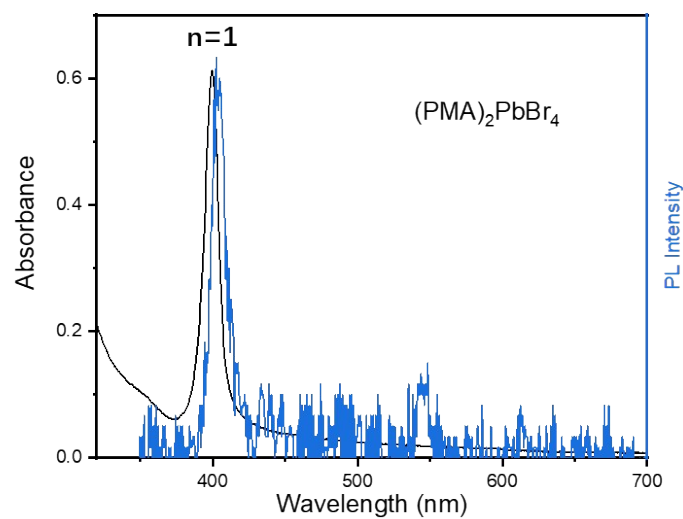

**Figure S2.** UV-vis absorption and PL spectra of  $(\text{PMA})_2\text{PbBr}_4$  film.

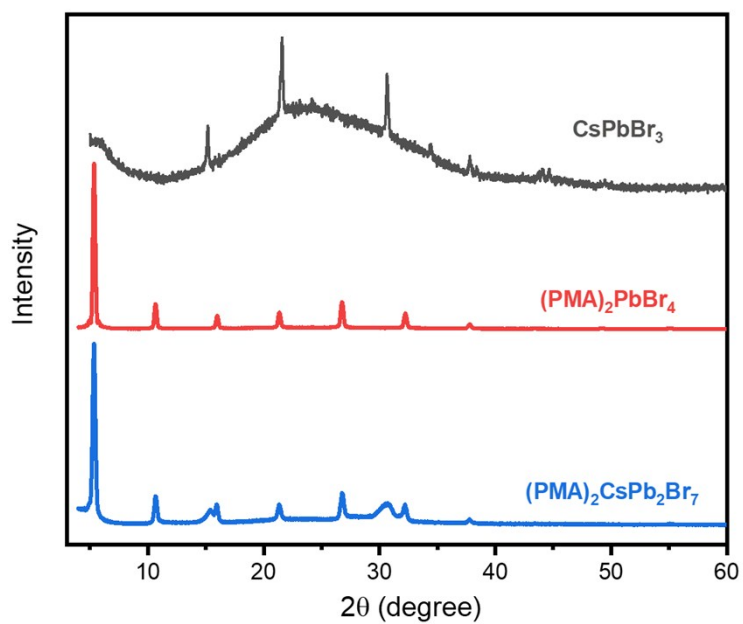

**Figure S3.** XRD profiles of  $\text{CsPbBr}_3$ ,  $(\text{PMA})_2\text{PbBr}_4$  and  $(\text{PMA})_2\text{CsPb}_2\text{Br}_7$  perovskites.
